# Supplementary material for: Neurobiological and behavioural responses of cleaning mutualisms to ocean warming and acidification
Source: PubMed Central journal article supplement (PMC6726634; doi:10.1038/s41598-019-49086-0), 2019-09-04
Supplement: 41598_2019_49086_MOESM1_ESM.pdf [file 41598_2019_49086_MOESM1_ESM.pdf]

## Supplementary information

### Neurobiological and behavioural responses of cleaning mutualisms to ocean warming and acidification

José Ricardo Paula<sup>1\*</sup>, Tiago Repolho<sup>1</sup>, Maria Rita Pegado<sup>1</sup>, Per-Ove Thörnqvist<sup>2</sup>, Regina Bispo<sup>3</sup>, Svante Winberg<sup>2</sup>, Philip L. Munday<sup>4</sup>, Rui Rosa<sup>1</sup>

<sup>1</sup>MARE – Marine and Environmental Sciences Centre, Laboratório Marítimo da Guia, Faculdade de Ciências da Universidade de Lisboa, Av. Nossa Senhora do Cabo, 939, 2750-374 Cascais, Portugal

<sup>2</sup>Department of Neuroscience, Physiology Unit, Biomedical Centre (BMC), Uppsala University, Box 593, Uppsala SE-75124, Sweden

<sup>3</sup>Departamento de Matemática, Centro de Matemática e Aplicações, Faculdade de Ciências e Tecnologia, Universidade Nova de Lisboa, Campus da Caparica, 2829-516 Caparica, Portugal

<sup>4</sup>ARC Centre of Excellence for Coral Reef Studies, James Cook University, Townsville, QLD 4811, Australia

\* Corresponding author: José Ricardo Paula; Telephone: +351 214869211; E-mail: jrpaula@fc.ul.pt;

#### Table of Contents

|                                                                                    |   |
|------------------------------------------------------------------------------------|---|
| Table S1. Seawater physicochemical parameters in all experimental setups.          | 2 |
| Table S2. GLM analysis of the behavioural variables                                | 3 |
| Table S3. GLMM analysis of the neurobiological variables measured in cleaner fish. | 4 |
| Table S4. GLMM analysis of the neurobiological variables measured in client fish.  | 6 |
| Figure S1-S2. Canonical correlation analysis between in cleaner fish.              | 8 |
| Figure S3-S4. Canonical correlation analysis in client fish.                       | 9 |

**TABLE S1. Seawater physicochemical parameters in all experimental setups.**

|                         | Control       | High CO <sub>2</sub> | Warming       | Warming + High CO <sub>2</sub> |
|-------------------------|---------------|----------------------|---------------|--------------------------------|
| <b>Measured</b>         |               |                      |               |                                |
| Temperature(°C)         | 29.0 ± 0.3    | 29.0 ± 0.3           | 32.0 ± 0.6    | 32.0 ± 0.6                     |
| pH                      | 8.04 ± 0.01   | 7.73 ± 0.01          | 8.04 ± 0.01   | 7.73 ± 0.02                    |
| AT (μmol/kgSW)          | 2388.4 ± 32.9 | 2398.9 ± 44.3        | 2392.0 ± 44.8 | 2392.3 ± 48.1                  |
| Salinity (ppt)          | 35            | 35                   | 35            | 3.50E+01                       |
| <b>Calculated</b>       |               |                      |               |                                |
| CT (μmol/kgSW)          | 2043.0 ± 32.9 | 2224.1 ± 42.8        | 2017.2 ± 40.2 | 2197.6 ± 46.6                  |
| pCO <sub>2</sub> (μatm) | 409.0 ± 12.3  | 963.6 ± 37.0         | 404.8 ± 13.8  | 961.6 ± 45.7                   |
| Ω Arg                   | 4.0 ± 0.1     | 2.3 ± 0.1            | 4.4 ± 0.1     | 2.5 ± 0.1                      |

*Salinity, pH and temperature were measured daily and averaged over the whole experimental period. The combination of total alkalinity (AT) and pHT (pH total scale) was used to calculate carbonate system parameters [pCO<sub>2</sub> (carbon dioxide partial pressure), CT (total inorganic carbon) and Ω Arg (aragonite saturation state)]. Values are represented as mean ± standard deviation*

**TABLE S2.** Generalized Linear Models (GLM) analysis of the behavioural variables (number of interactions; proportion of interactions started by cleaners; client posing displays ratio; proportion of interactions with tactile stimulation; proportion of interactions with client jolts; interaction duration) measured during the behavioural trial between the cleaner fish *Labroides dimidiatus* and the client *Naso elegans*.

| <i>Model: GLM (Negative Binomial) Response variable: Number of interactions</i>                                |          |            |                      |                   |
|----------------------------------------------------------------------------------------------------------------|----------|------------|----------------------|-------------------|
| <i>Final model term(s): Principal effects of CO<sub>2</sub>, temperature and interaction between stressors</i> |          |            |                      |                   |
|                                                                                                                | Estimate | Std. Error | Estimate/ Std. Error | p                 |
| (Intercept)                                                                                                    | 2.77     | 0.15       | 18.72                | <b>&lt; 2e-16</b> |
| Warming                                                                                                        | -2.64    | 0.4        | -6.54                | <b>6.40E-11</b>   |
| High CO <sub>2</sub>                                                                                           | -1.91    | 0.3        | -6.41                | <b>1.50E-10</b>   |
| Warming × High CO <sub>2</sub>                                                                                 | 3.22     | 0.52       | 6.16                 | <b>7.20E-10</b>   |
| <i>Model: GLM (Binomial) Response variable: Proportion of interactions started by cleaners</i>                 |          |            |                      |                   |
| <i>Final model term(s): Principal effects of CO<sub>2</sub></i>                                                |          |            |                      |                   |
|                                                                                                                | Estimate | Std. Error | Estimate/ Std. Error | p                 |
| (Intercept)                                                                                                    | 0.67     | 0.18       | 3.7                  | <b>2.10E-04</b>   |
| High CO <sub>2</sub>                                                                                           | -3.48    | 0.62       | -5.61                | <b>2.10E-08</b>   |
| <i>Model: GLM (Gaussian) Response variable: Client posing displays ratio</i>                                   |          |            |                      |                   |
| <i>Final model term(s): Principal effects of CO<sub>2</sub>, temperature and interaction between stressors</i> |          |            |                      |                   |
|                                                                                                                | Estimate | Std. Error | Estimate/ Std. Error | p                 |
| (Intercept)                                                                                                    | 0.06     | 0.11       | 0.56                 | 0.58              |
| Warming                                                                                                        | 0.16     | 0.16       | 0.99                 | 0.33              |
| High CO <sub>2</sub>                                                                                           | 0.84     | 0.15       | 5.42                 | <b>9.86E-06</b>   |
| Warming × High CO <sub>2</sub>                                                                                 | 0.31     | 0.22       | 1.37                 | 0.18              |
| <i>Model: GLM (Binomial) Response variable: Proportion of interactions with tactile stimulation</i>            |          |            |                      |                   |
| <i>Final model term(s): Principal effects of CO<sub>2</sub></i>                                                |          |            |                      |                   |
|                                                                                                                | Estimate | Std. Error | Estimate/ Std. Error | p                 |
| (Intercept)                                                                                                    | -2.17    | 0.28       | -7.67                | <b>1.70E-14</b>   |
| High CO <sub>2</sub>                                                                                           | 1.24     | 0.42       | 2.97                 | <b>2.90E-03</b>   |
| <i>Model: GLM (Binomial) Response variable: Proportion of interactions with client jolts</i>                   |          |            |                      |                   |
| <i>Final model term(s): Principal effects of temperature</i>                                                   |          |            |                      |                   |
|                                                                                                                | Estimate | Std. Error | Estimate/ Std. Error | p                 |
| (Intercept)                                                                                                    | -2.71    | 0.37       | -7.42                | <b>1.20E-13</b>   |
| Warming                                                                                                        | 1.03     | 0.73       | 1.42                 | 0.16              |
| High CO <sub>2</sub>                                                                                           | 1.61     | 0.89       | 1.80                 | 0.07              |
| Warming × High CO <sub>2</sub>                                                                                 | -1.95    | 1.22       | -1.60                | 0.11              |
| <i>Model: GLM (Gaussian) Response variable: Interaction duration</i>                                           |          |            |                      |                   |
| <i>Final model term(s): Principal effects of CO<sub>2</sub>, temperature and interaction between stressors</i> |          |            |                      |                   |
|                                                                                                                | Estimate | Std. Error | Estimate/ Std. Error | p                 |
| (Intercept)                                                                                                    | 4.63     | 0.81       | 5.72                 | <b>7.90E-06</b>   |
| Warming                                                                                                        | -2.31    | 1.40       | -1.65                | 0.11              |
| High CO <sub>2</sub>                                                                                           | -1.05    | 1.14       | -0.92                | 0.37              |
| Warming × High CO <sub>2</sub>                                                                                 | 2.34     | 1.83       | 1.28                 | 0.22              |

**Numbers in bold p<0.05**

**TABLE S3. Generalized Linear Mixed Models (GLMM) analysis of the neurobiological variables (dopamine, serotonin, DOPAC and 5-HIAA concentration) measured in the cleaner fish *L. dimidiatus*.**

| <i>Model: GLMM (Gamma)</i>                                                                                                                        |          | <i>Response variable: Dopamine concentration</i>  |                      |                 |  |
|---------------------------------------------------------------------------------------------------------------------------------------------------|----------|---------------------------------------------------|----------------------|-----------------|--|
| <i>Final model term(s): Principal effects of CO<sub>2</sub>, temperature, brain region and interaction between CO<sub>2</sub> and temperature</i> |          |                                                   |                      |                 |  |
| <i>Reference level (Brain region): FB</i>                                                                                                         | Estimate | Std. Error                                        | Estimate/ Std. Error | p               |  |
| (Intercept)                                                                                                                                       | 1.14     | 0.27                                              | 4.22                 | <b>2.50E-05</b> |  |
| High CO <sub>2</sub>                                                                                                                              | -0.89    | 0.30                                              | -2.99                | <b>2.80E-03</b> |  |
| Warming                                                                                                                                           | -0.56    | 0.30                                              | -1.85                | 0.06            |  |
| Brain region (FBvsHB)                                                                                                                             | 1.00     | 0.24                                              | 4.16                 | <b>3.20E-05</b> |  |
| Brain region (FBvsMB)                                                                                                                             | 1.26     | 0.24                                              | 5.17                 | <b>2.30E-07</b> |  |
| High CO <sub>2</sub> x Warming                                                                                                                    | 1.13     | 0.42                                              | 2.71                 | <b>0.01</b>     |  |
| <i>Reference level (Brain region): MB</i>                                                                                                         | Estimate | Std. Error                                        | Estimate/ Std. Error | p               |  |
| (Intercept)                                                                                                                                       | 2.40     | 0.26                                              | 9.31                 | <b>2.00E-16</b> |  |
| High CO <sub>2</sub>                                                                                                                              | -0.89    | 0.30                                              | -2.99                | <b>2.80E-03</b> |  |
| Warming                                                                                                                                           | -0.56    | 0.30                                              | -1.85                | 0.06            |  |
| Brain region (MBvsFB)                                                                                                                             | -1.26    | 0.24                                              | -5.17                | <b>2.30E-07</b> |  |
| Brain region (MBvsHB)                                                                                                                             | -0.27    | 0.24                                              | -1.13                | <b>0.26</b>     |  |
| High CO <sub>2</sub> x Warming                                                                                                                    | 1.13     | 0.42                                              | 2.71                 | <b>0.01</b>     |  |
| <i>Model: GLMM (Gamma)</i>                                                                                                                        |          | <i>Response variable: DOPAC concentration</i>     |                      |                 |  |
| <i>Final model term(s): Principal effects of CO<sub>2</sub>, temperature, brain region and interaction between them.</i>                          |          |                                                   |                      |                 |  |
| <i>Reference level (Brain region): FB</i>                                                                                                         | Estimate | Std. Error                                        | Estimate/ Std. Error | p               |  |
| (Intercept)                                                                                                                                       | 1.92     | 0.58                                              | 3.30                 | <b>9.60E-04</b> |  |
| High CO <sub>2</sub>                                                                                                                              | 1.40     | 1.14                                              | 1.24                 | 0.22            |  |
| Warming                                                                                                                                           | -0.32    | 0.73                                              | -0.44                | 0.66            |  |
| Brain region (FBvsHB)                                                                                                                             | 0.06     | 0.38                                              | 0.15                 | 0.88            |  |
| Brain region (FBvsMB)                                                                                                                             | 1.69     | 1.06                                              | 1.60                 | 0.11            |  |
| High CO <sub>2</sub> x Warming                                                                                                                    | -1.59    | 1.32                                              | -1.20                | 0.23            |  |
| High CO <sub>2</sub> x Brain region (FBvsHB)                                                                                                      | 0.97     | 1.61                                              | 0.60                 | 0.55            |  |
| High CO <sub>2</sub> x Brain region (FBvsMB)                                                                                                      | -0.36    | 1.96                                              | -0.18                | 0.85            |  |
| Warming x Brain region (FBvsHB)                                                                                                                   | 0.30     | 0.54                                              | 0.55                 | 0.58            |  |
| Warming x Brain region (FBvsMB)                                                                                                                   | 1.01     | 1.65                                              | 0.61                 | 0.54            |  |
| High CO <sub>2</sub> x Warming x Brain region (FBvsHB)                                                                                            | -1.39    | 1.68                                              | -0.82                | 0.41            |  |
| High CO <sub>2</sub> x Warming x Brain region (FBvsMB)                                                                                            | 5.88     | 3.78                                              | 1.56                 | 0.12            |  |
| <i>Reference level (Brain region): MB</i>                                                                                                         | Estimate | Std. Error                                        | Estimate/ Std. Error | p               |  |
| (Intercept)                                                                                                                                       | 3.61     | 1.07                                              | 3.36                 | <b>7.70E-04</b> |  |
| High CO <sub>2</sub>                                                                                                                              | 1.04     | 1.77                                              | 0.59                 | 0.56            |  |
| Warming                                                                                                                                           | 0.69     | 1.68                                              | 0.41                 | 0.68            |  |
| Brain region (MBvsFB)                                                                                                                             | -1.69    | 1.06                                              | -1.60                | 0.11            |  |
| Brain region (MBvsHB)                                                                                                                             | -1.63    | 1.07                                              | -1.53                | 0.13            |  |
| High CO <sub>2</sub> x Warming                                                                                                                    | 4.29     | 3.70                                              | 1.16                 | 0.25            |  |
| High CO <sub>2</sub> x Brain region (MBvsFB)                                                                                                      | 0.36     | 1.96                                              | 0.18                 | 0.85            |  |
| High CO <sub>2</sub> x Brain region (MBvsHB)                                                                                                      | 1.33     | 2.14                                              | 0.62                 | 0.53            |  |
| Warming x Brain region (MBvsFB)                                                                                                                   | -1.01    | 1.65                                              | -0.61                | 0.54            |  |
| Warming x Brain region (MBvsHB)                                                                                                                   | -0.72    | 1.67                                              | -0.43                | 0.67            |  |
| High CO <sub>2</sub> x Warming x Brain region (MBvsFB)                                                                                            | -5.88    | 3.78                                              | -1.56                | 0.12            |  |
| High CO <sub>2</sub> x Warming x Brain region (MBvsHB)                                                                                            | -7.26    | 3.89                                              | -1.87                | 0.06            |  |
| <i>Model: GLMM (Gamma)</i>                                                                                                                        |          | <i>Response variable: Serotonin concentration</i> |                      |                 |  |
| <i>Final model term(s): Principal effects of CO<sub>2</sub>, brain region and interaction between them.</i>                                       |          |                                                   |                      |                 |  |
| <i>Reference level (Brain region): FB</i>                                                                                                         | Estimate | Std. Error                                        | Estimate/ Std. Error | p               |  |
| (Intercept)                                                                                                                                       | 0.0896   | 0.0103                                            | 8.69                 | <b>2.00E-16</b> |  |
| High CO <sub>2</sub>                                                                                                                              | 0.01     | 0.02                                              | 0.86                 | 0.39            |  |
| Brain region (FBvsHB)                                                                                                                             | 0.31     | 0.05                                              | 6.32                 | <b>2.50E-10</b> |  |
| Brain region (FBvsMB)                                                                                                                             | 0.54     | 0.07                                              | 7.38                 | <b>1.50E-13</b> |  |
| High CO <sub>2</sub> x Brain region (FBvsHB)                                                                                                      | -0.16    | 0.06                                              | -2.75                | <b>0.01</b>     |  |
| High CO <sub>2</sub> x Brain region (FBvsMB)                                                                                                      | -0.14    | 0.09                                              | -1.46                | 0.14            |  |
| <i>Reference level (Brain region): MB</i>                                                                                                         | Estimate | Std. Error                                        | Estimate/ Std. Error | p               |  |
| (Intercept)                                                                                                                                       | 0.63     | 0.07                                              | 8.69                 | <b>2.00E-16</b> |  |
| High CO <sub>2</sub>                                                                                                                              | -0.12    | 0.09                                              | -1.33                | 0.18            |  |
| Brain region (MBvsFB)                                                                                                                             | -0.54    | 0.07                                              | -7.38                | <b>1.50E-13</b> |  |
| Brain region (MBvsHB)                                                                                                                             | -0.23    | 0.09                                              | -2.63                | <b>0.01</b>     |  |
| High CO <sub>2</sub> x Brain region (MBvsFB)                                                                                                      | 0.14     | 0.09                                              | 1.46                 | 0.14            |  |
| High CO <sub>2</sub> x Brain region (MBvsHB)                                                                                                      | -0.02    | 0.11                                              | -0.21                | 0.83            |  |
| <i>Model: GLMM (Gamma)</i>                                                                                                                        |          | <i>Response variable: 5-HIAA concentration</i>    |                      |                 |  |
| <i>Final model term(s): Principal effects of CO<sub>2</sub>, temperature, brain region and interaction between them.</i>                          |          |                                                   |                      |                 |  |
| <i>Reference level (Brain region): FB</i>                                                                                                         | Estimate | Std. Error                                        | Estimate/ Std. Error | p               |  |
| (Intercept)                                                                                                                                       | 0.81     | 0.20                                              | 3.95                 | <b>7.70E-05</b> |  |
| High CO <sub>2</sub>                                                                                                                              | -0.20    | 0.26                                              | -0.77                | 0.44            |  |
| Warming                                                                                                                                           | -0.09    | 0.28                                              | -0.33                | 0.74            |  |
| Brain region (FBvsHB)                                                                                                                             | -0.13    | 0.13                                              | -0.98                | 0.33            |  |

|                                            |          |            |                      |                 |
|--------------------------------------------|----------|------------|----------------------|-----------------|
| Brain region (FBvsMB)                      | 2.55     | 0.91       | 2.81                 | <b>4.90E-03</b> |
| High CO2 x Warming                         | 0.26     | 0.39       | 0.65                 | 0.51            |
| High CO2 x Brain region (FBvsHB)           | 2.74     | 0.88       | 3.10                 | <b>1.90E-03</b> |
| High CO2 x Brain region (FBvsMB)           | -1.10    | 1.07       | -1.03                | 0.30            |
| Warming x Brain region (FBvsHB)            | 2.21     | 0.78       | 2.85                 | <b>4.40E-03</b> |
| Warming x Brain region (FBvsMB)            | -1.19    | 1.07       | -1.11                | 0.27            |
| High CO2 x Warming x Brain region (FBvsHB) | -4.76    | 1.19       | -4.01                | <b>6.00E-05</b> |
| High CO2 x Warming x Brain region (FBvsMB) | 0.68     | 1.29       | 0.53                 | 0.60            |
| <i>Reference level (Brain region): MB</i>  | Estimate | Std. Error | Estimate/ Std. Error | p               |
| (Intercept)                                | 3.36     | 0.90       | 3.73                 | <b>1.90E-04</b> |
| High CO2                                   | -1.31    | 1.06       | -1.23                | 0.22            |
| Warming                                    | -1.29    | 1.06       | -1.21                | 0.23            |
| Brain region (MBvsFB)                      | -2.55    | 0.91       | -2.81                | <b>4.89E-03</b> |
| Brain region (MBvsHB)                      | -2.68    | 0.90       | -2.97                | <b>2.99E-03</b> |
| High CO2 x Warming                         | 0.94     | 1.28       | 0.73                 | 0.46            |
| High CO2 x Brain region (MBvsFB)           | 1.10     | 1.07       | 1.03                 | 0.30            |
| High CO2 x Brain region (MBvsHB)           | 3.84     | 1.36       | 2.82                 | <b>4.84E-03</b> |
| Warming x Brain region (MBvsFB)            | 1.19     | 1.07       | 1.11                 | 0.27            |
| Warming x Brain region (MBvsHB)            | 3.41     | 1.30       | 2.63                 | <b>0.01</b>     |
| High CO2 x Warming x Brain region (MBvsFB) | -0.68    | 1.30       | -0.53                | 0.60            |
| High CO2 x Warming x Brain region (MBvsHB) | -5.44    | 1.71       | -3.17                | <b>1.51E-03</b> |

**Numbers in bold  $p < 0.05$**

**TABLE S4. Generalized Linear Mixed Models (GLMM) analysis of the neurobiological variables (dopamine, serotonin, DOPAC and 5-HIAA concentration) measured in the client fish *Naso elegans*.**

| Model: GLMM (Gamma)                                                                                                                            |          | Response variable: Dopamine concentration  |                      |                  |  |
|------------------------------------------------------------------------------------------------------------------------------------------------|----------|--------------------------------------------|----------------------|------------------|--|
| Final model term(s): Principal effects of CO <sub>2</sub> , temperature, brain region and interaction between CO <sub>2</sub> and temperature  |          |                                            |                      |                  |  |
| Reference level (Brain region): FB                                                                                                             | Estimate | Std. Error                                 | Estimate/ Std. Error | p                |  |
| (Intercept)                                                                                                                                    | 0.18     | 0.05                                       | 3.73                 | <b>1.90E-04</b>  |  |
| High CO <sub>2</sub>                                                                                                                           | 0.17     | 0.09                                       | 2.01                 | <b>0.04</b>      |  |
| Warming                                                                                                                                        | 0.06     | 0.07                                       | 0.89                 | 0.37             |  |
| Brain region (FBvsHB)                                                                                                                          | 1.87     | 0.22                                       | 8.43                 | <b>2.00E-16</b>  |  |
| Brain region (FBvsMB)                                                                                                                          | 10.50    | 1.11                                       | 9.42                 | <b>2.00E-16</b>  |  |
| High CO <sub>2</sub> x Warming                                                                                                                 | -0.16    | 0.11                                       | -1.38                | 0.17             |  |
| Reference level (Brain region): MB                                                                                                             | Estimate | Std. Error                                 | Estimate/ Std. Error | p                |  |
| (Intercept)                                                                                                                                    | 10.68    | 1.12                                       | 9.58                 | <b>&lt;2E-16</b> |  |
| High CO <sub>2</sub>                                                                                                                           | 0.17     | 0.09                                       | 2.01                 | <b>0.04</b>      |  |
| Warming                                                                                                                                        | 0.06     | 0.07                                       | 0.89                 | 0.37             |  |
| Brain region (MBvsFB)                                                                                                                          | -10.50   | 1.11                                       | -9.42                | <b>&lt;2E-16</b> |  |
| Brain region (MBvsHB)                                                                                                                          | -8.63    | 1.14                                       | -7.60                | <b>3.00E-14</b>  |  |
| High CO <sub>2</sub> x Warming                                                                                                                 | -0.16    | 0.11                                       | -1.38                | 0.17             |  |
| Model: GLMM (Gamma)                                                                                                                            |          | Response variable: DOPAC concentration     |                      |                  |  |
| Final model term(s): Principal effects of CO <sub>2</sub> , temperature, brain region and interaction between them.                            |          |                                            |                      |                  |  |
| Reference level (Brain region): FB                                                                                                             | Estimate | Std. Error                                 | Estimate/ Std. Error | p                |  |
| (Intercept)                                                                                                                                    | -3.77    | 0.49                                       | -7.74                | <b>9.90E-15</b>  |  |
| High CO <sub>2</sub>                                                                                                                           | 0.62     | 0.66                                       | 0.94                 | 0.35             |  |
| Warming                                                                                                                                        | 0.24     | 0.66                                       | 0.36                 | 0.72             |  |
| Brain region (FBvsHB)                                                                                                                          | -0.08    | 0.66                                       | -0.12                | 0.91             |  |
| Brain region (FBvsMB)                                                                                                                          | -2.73    | 0.66                                       | -4.14                | <b>3.50E-05</b>  |  |
| High CO <sub>2</sub> x Warming                                                                                                                 | -0.85    | 0.91                                       | -0.93                | 0.35             |  |
| High CO <sub>2</sub> x Brain region (FBvsHB)                                                                                                   | -0.06    | 0.91                                       | -0.06                | 0.95             |  |
| High CO <sub>2</sub> x Brain region (FBvsMB)                                                                                                   | -0.36    | 0.91                                       | -0.39                | 0.70             |  |
| Warming x Brain region (FBvsHB)                                                                                                                | -0.40    | 0.91                                       | -0.44                | 0.66             |  |
| Warming x Brain region (FBvsMB)                                                                                                                | -0.79    | 0.91                                       | -0.86                | 0.39             |  |
| High CO <sub>2</sub> x Warming x Brain region (FBvsHB)                                                                                         | 1.04     | 1.27                                       | 0.82                 | 0.41             |  |
| High CO <sub>2</sub> x Warming x Brain region (FBvsMB)                                                                                         | 0.52     | 1.27                                       | 0.41                 | 0.68             |  |
| Reference level (Brain region): MB                                                                                                             | Estimate | Std. Error                                 | Estimate/ Std. Error | p                |  |
| (Intercept)                                                                                                                                    | -6.50    | 0.45                                       | -14.61               | <b>2.00E-16</b>  |  |
| High CO <sub>2</sub>                                                                                                                           | 0.26     | 0.63                                       | 0.42                 | 0.67             |  |
| Warming                                                                                                                                        | -0.55    | 0.63                                       | -0.88                | 0.38             |  |
| Brain region (MBvsFB)                                                                                                                          | 2.73     | 0.66                                       | 4.14                 | <b>3.50E-05</b>  |  |
| Brain region (MBvsHB)                                                                                                                          | 2.65     | 0.63                                       | 4.22                 | <b>2.50E-05</b>  |  |
| High CO <sub>2</sub> x Warming                                                                                                                 | -0.33    | 0.89                                       | -0.37                | 0.71             |  |
| High CO <sub>2</sub> x Brain region (MBvsFB)                                                                                                   | 0.36     | 0.91                                       | 0.39                 | 0.70             |  |
| High CO <sub>2</sub> x Brain region (MBvsHB)                                                                                                   | 0.30     | 0.89                                       | 0.34                 | 0.74             |  |
| Warming x Brain region (MBvsFB)                                                                                                                | 0.79     | 0.91                                       | 0.86                 | 0.39             |  |
| Warming x Brain region (MBvsHB)                                                                                                                | 0.39     | 0.89                                       | 0.43                 | 0.66             |  |
| High CO <sub>2</sub> x Warming x Brain region (MBvsFB)                                                                                         | -0.52    | 1.27                                       | -0.41                | 0.68             |  |
| High CO <sub>2</sub> x Warming x Brain region (MBvsHB)                                                                                         | 0.52     | 1.26                                       | 0.41                 | 0.68             |  |
| Model: GLMM (Gamma)                                                                                                                            |          | Response variable: Serotonin concentration |                      |                  |  |
| Final model term(s): Principal effects of CO <sub>2</sub> , and brain region                                                                   |          |                                            |                      |                  |  |
| Reference level (Brain region): FB                                                                                                             | Estimate | Std. Error                                 | Estimate/ Std. Error | p                |  |
| (Intercept)                                                                                                                                    | 0.51     | 0.07                                       | 7.33                 | <b>2.30E-13</b>  |  |
| High CO <sub>2</sub>                                                                                                                           | -0.12    | 0.08                                       | -1.60                | 0.11             |  |
| Brain region (FBvsHB)                                                                                                                          | -0.33    | 0.08                                       | -4.27                | <b>2.00E-05</b>  |  |
| Brain region (FBvsMB)                                                                                                                          | -1.24    | 0.08                                       | -16.25               | <b>2.00E-16</b>  |  |
| Reference level (Brain region): MB                                                                                                             | Estimate | Std. Error                                 | Estimate/ Std. Error | p                |  |
| (Intercept)                                                                                                                                    | -0.73    | 0.07                                       | -10.40               | <b>&lt;2E-16</b> |  |
| High CO <sub>2</sub>                                                                                                                           | -0.12    | 0.08                                       | -1.60                | 0.11             |  |
| Brain region (MBvsFB)                                                                                                                          | 1.24     | 0.08                                       | 16.20                | <b>&lt;2E-16</b> |  |
| Brain region (MBvsHB)                                                                                                                          | 0.91     | 0.08                                       | 12.00                | <b>&lt;2E-16</b> |  |
| Model: GLMM (Gamma)                                                                                                                            |          | Response variable: 5-HIAA concentration    |                      |                  |  |
| Final model term(s): Principal effects of CO <sub>2</sub> , temperature, brain region and interaction between CO <sub>2</sub> and brain region |          |                                            |                      |                  |  |
| Reference level (Brain region): FB                                                                                                             | Estimate | Std. Error                                 | Estimate/ Std. Error | p                |  |
| (Intercept)                                                                                                                                    | 2.93     | 0.40                                       | 7.38                 | <b>1.60E-13</b>  |  |
| High CO <sub>2</sub>                                                                                                                           | -0.02    | 0.43                                       | -0.05                | 0.96             |  |
| Warming                                                                                                                                        | -0.61    | 0.41                                       | -1.51                | 0.13             |  |
| Brain region (FBvsHB)                                                                                                                          | 2.66     | 0.58                                       | 4.60                 | <b>4.30E-06</b>  |  |
| Brain region (FBvsMB)                                                                                                                          | 4.44     | 0.75                                       | 5.92                 | <b>3.20E-09</b>  |  |
| High CO <sub>2</sub> x Brain region (FBvsHB)                                                                                                   | 2.31     | 0.98                                       | 2.36                 | <b>0.02</b>      |  |
| High CO <sub>2</sub> x Brain region (FBvsMB)                                                                                                   | -0.18    | 1.04                                       | -0.17                | 0.86             |  |
| Reference level (Brain region): MB                                                                                                             | Estimate | Std. Error                                 | Estimate/ Std. Error | p                |  |

|                                  |       |      |       |                  |
|----------------------------------|-------|------|-------|------------------|
| (Intercept)                      | 7.37  | 0.76 | 9.67  | <b>&lt;2E-16</b> |
| High CO2                         | -0.20 | 1.02 | -0.20 | 0.84             |
| Warming                          | -0.61 | 0.41 | -1.51 | 0.13             |
| Brain region (MBvsFB)            | -4.44 | 0.75 | -5.92 | <b>3.20E-09</b>  |
| Brain region (MBvsHB)            | -1.78 | 0.88 | -2.03 | <b>0.04</b>      |
| High CO2 x Brain region (MBvsFB) | 0.18  | 1.04 | 0.17  | 0.86             |
| High CO2 x Brain region (MBvsHB) | 2.49  | 1.35 | 1.85  | 0.06             |

**Numbers in bold p<0.05**

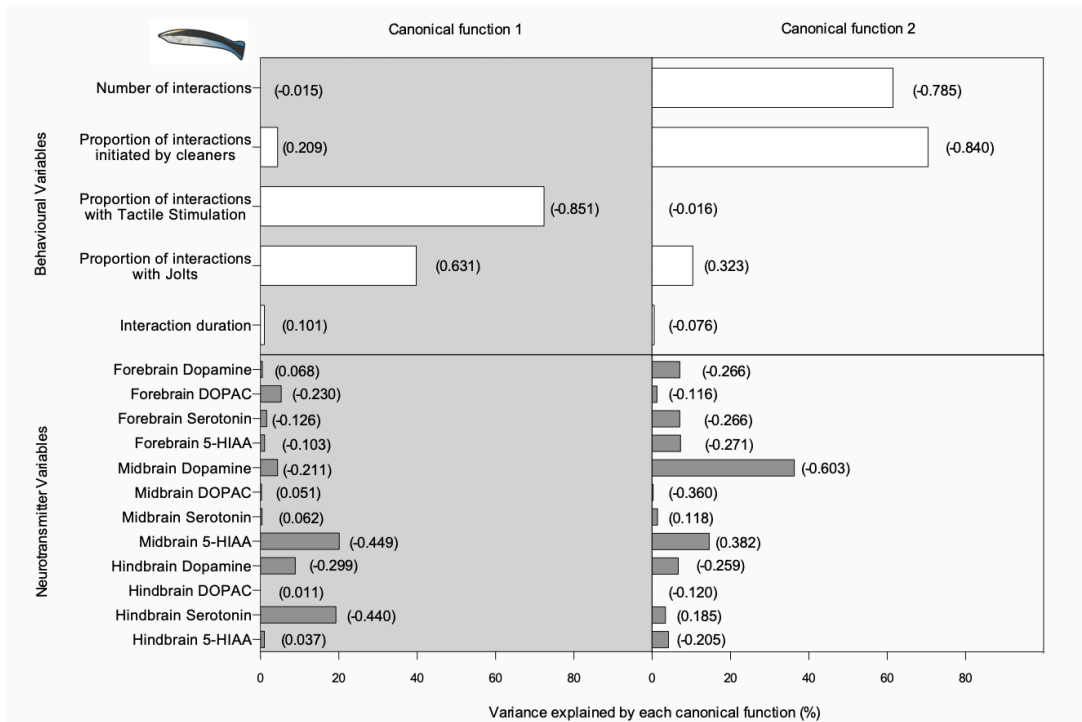

**Figure S1.** Canonical correlation analysis between behavioural and neurotransmitter variables related to cleaner fish *Labroides dimidiatus*. Percentage of variance explained each canonical function for analysed variables is shown in bars. Numbers in parenthesis indicate respective canonical cross-loading.

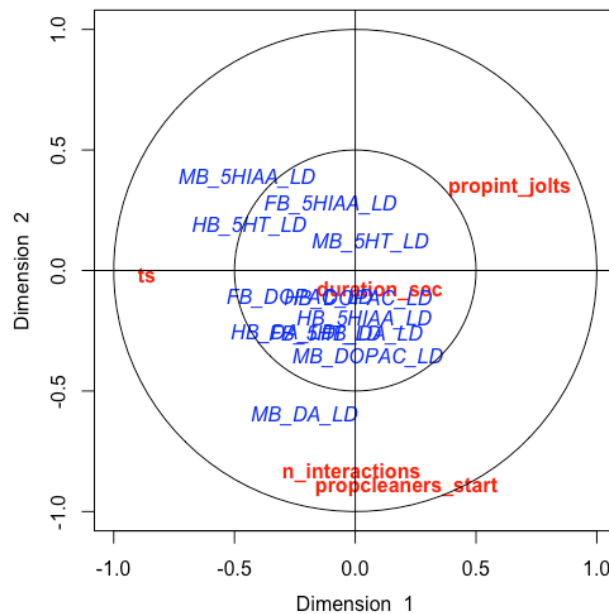

**Figure S2.** Biplot of the canonical correlation analysis between behavioural and neurotransmitter variables related to cleaner fish *Labroides dimidiatus*.



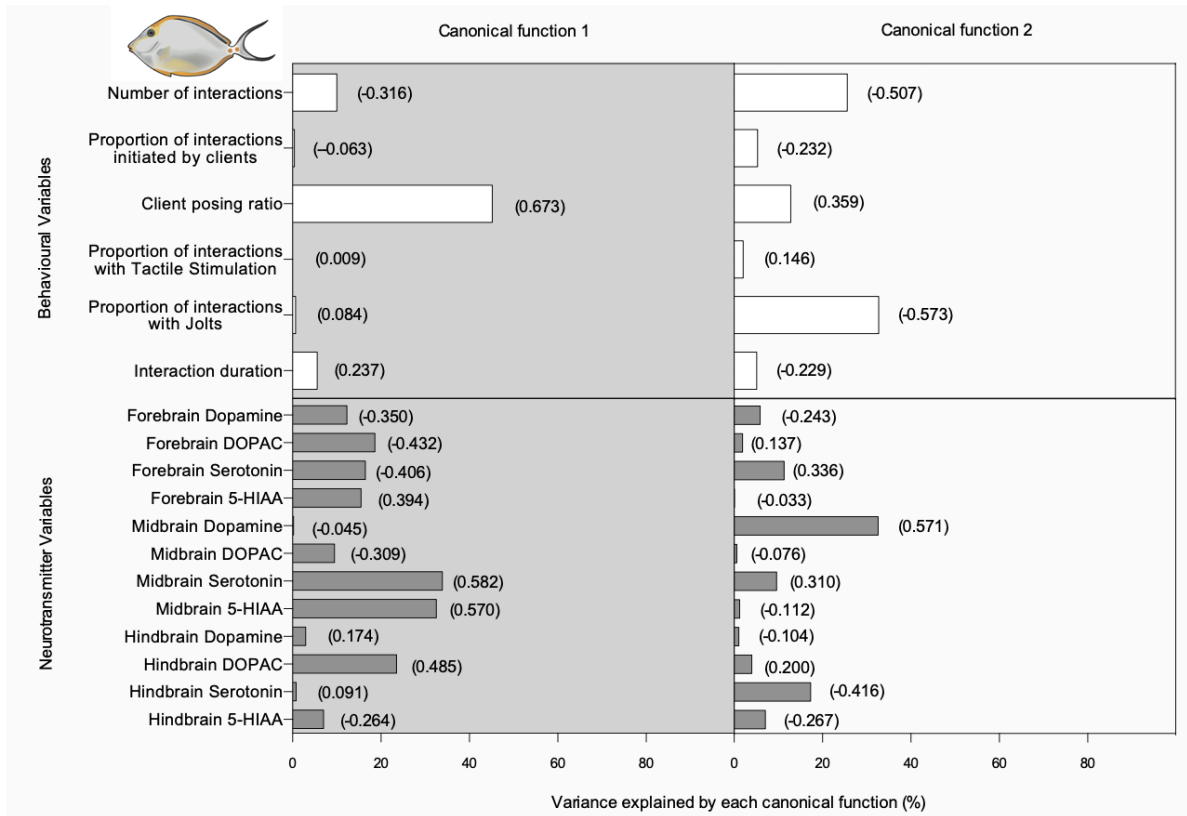

**Figure S3.** Canonical correlation analysis between behavioural and neurotransmitter variables related to client fish *Naso elegans*. Percentage of variance explained by each canonical function for analysed variables is shown in bars. Numbers in parenthesis indicate respective canonical cross-loading.

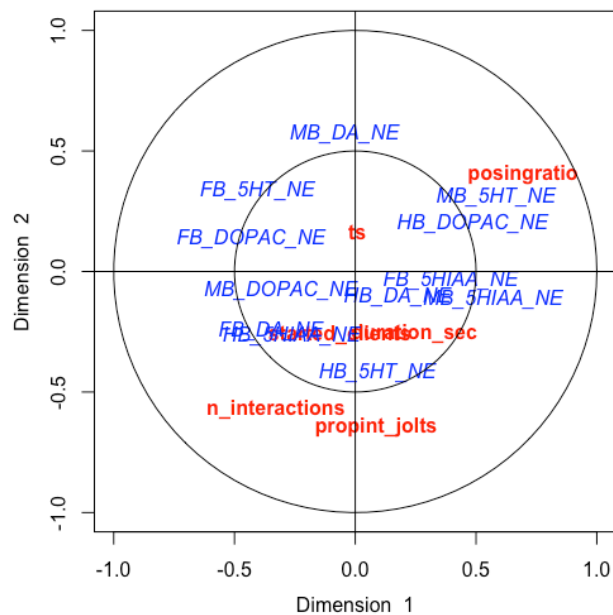

**Figure S4.** Biplot of the canonical correlation analysis between behavioural and neurotransmitter variables related to client fish *Naso elegans*.
